# Supplementary material for: CmMYB#7, an R3 MYB transcription factor, acts as a negative regulator of anthocyanin biosynthesis in chrysanthemum
Source: PubMed Central journal article supplement — J Exp Bot. 2019 Apr 17;70(12):3111–23. doi: 10.1093/jxb/erz121 (PMC6598077; doi:10.1093/jxb/erz121), 2019-04-17
Supplement: erz121_supplementary-tables_s1-s2_figures_s1-s7.pdf [file erz121_supplementary-tables_s1-s2_figures_s1-s7.pdf]

## Supplemental Tables

Supplementary Table S1 Primers used in QPCR

| Genes          | Primers  | Sequences (5'-3')          |
|----------------|----------|----------------------------|
| <i>CmMYB2</i>  | Forward  | AGAAGCCGTTTGTGCCGTTTAG     |
|                | Reversed | CCGTTACACATTCCGTTACCA      |
| <i>CmMYB3</i>  | Forward  | TCATCTAGCACGGTTTCGTATG     |
|                | Reversed | TGGCACACTTGTATTTGTACACGT   |
| <i>CmMYB4</i>  | Forward  | TGGACTATAGAAGCTTGGAGATGA   |
|                | Reversed | GCTTGCATACGACTATACGAGTGA   |
| <i>CmMYB5</i>  | Forward  | GCGTTGCGTCAACATCTAGTG      |
|                | Reversed | CAACACACGAACTCCTTCTTC      |
| <i>CmMYB6</i>  | Forward  | ACGGCGAAATAGGGTGGTCATTAG   |
|                | Reversed | GGATTGCAATATCATAGTTGGTCCG  |
| <i>CmMYB74</i> | Forward  | ACATTCCTCGTCACCAACATCT     |
|                | Reversed | GAAACTCAAACCTGCTTGTCTGTGGT |
| <i>CmMYB#1</i> | Forward  | GAGTCTCCAGACAATTCAGATC     |
|                | Reversed | GAACAACCACACCACCAACTG      |
| <i>CmMYB#2</i> | Forward  | CTCATACTCGCCAAACTCGTC      |
|                | Reversed | GAGTAGACAACCTGTCAAGTAG     |
| <i>CmMYB#3</i> | Forward  | CCAGGAATTGGCCACCATTG       |
|                | Reversed | CCTGAATGCTTTAGCTAAGTCC     |
| <i>CmMYB#4</i> | Forward  | GCGAGGTAGATGACATTGTGG      |

|                 |          |                          |
|-----------------|----------|--------------------------|
|                 | Reversed | CTCAGGTA ACTCGGGTAGTTCC  |
| <i>CmMYB#5</i>  | Forward  | CATTGGGAGCAGGGATCCCGAGC  |
|                 | Reversed | CTCTGGGTGGGTTTTGCTCTC    |
| <i>CmMYB#7</i>  | Forward  | TACAGGATGCACAAGCTTGTTG   |
|                 | Reversed | ACATCGTATGAGACAAAGTGTC   |
| <i>CmMYB#8</i>  | Forward  | TCGTGCTACCGTACTTGCCTG    |
|                 | Reversed | GCCACA ACTCATCCATGTTCC   |
| <i>CmMYB#9</i>  | Forward  | CAATACATCTCCACCGTACAG    |
|                 | Reversed | GATGCACTTAAAGACACTTTGG   |
| <i>CmMYB#10</i> | Forward  | CATGGATGATGACATGGTTTTGG  |
|                 | Reversed | GTGGTAATCCATCTCCTCTTG TG |
| <i>CmMYB#11</i> | Forward  | GATCATTCAGGGTCGAAAATGAG  |
|                 | Reversed | CATATCTGATGGAAGACATCAG   |
| <i>CmMYB#12</i> | Forward  | CGTTAGGGCTTCCTGGGATGG    |
|                 | Reversed | CCTTGATTATCACAATACGATG   |
| <i>CmMYB#13</i> | Forward  | CCCCTGACTCTCCGCTACCTCC   |
|                 | Reversed | GCATTACTAATAGCAACTTCACC  |
| <i>CmMYB#14</i> | Forward  | GCTGGGACAAGATGATGAGTGG   |
|                 | Reversed | GGCCCCGTCGAGTTGGCTTGCGG  |
| <i>CmMYB#15</i> | Forward  | GTGATGGTCTATTAGCGGATCC   |
|                 | Reversed | CATCACCATCAAAATTCACCTTC  |
| <i>CmMYB#16</i> | Forward  | GCATGAGCTCAAAATCTTCACAG  |

|                 |          |                           |
|-----------------|----------|---------------------------|
|                 | Reversed | AACCTTAATTCCATTGCCAATG    |
| <i>CmMYB#17</i> | Forward  | GGATAAGCAGTGGTGACATGGC    |
|                 | Reversed | CCAAGTGTCTATCTAGCTACATG   |
| <i>CmMYB#18</i> | Forward  | CGTTGCAACTTTACTAGAGGTG    |
|                 | Reversed | CTCTAAAGCATGAGAGAACTAG    |
| <i>CmMYB#19</i> | Forward  | CTATGGCACAAGGAATTCCGAGC   |
|                 | Reversed | TTGCAAGGTGGTGA CTGAGAAG   |
| <i>CmMYB#20</i> | Forward  | CAATGTGGGTGTTGTGGAGGAGG   |
|                 | Reversed | CTCCCTAACTTCTCTAGCAATC    |
| <i>CmMYB#21</i> | Forward  | GGATGTTTCGCAATCAGTTTCG    |
|                 | Reversed | CACTTTGTGTTGCAGCCTCATC    |
| <i>CmMYB#22</i> | Forward  | GGAGGAAGCAGAAGAGATAACAC   |
|                 | Reversed | CATATTCCAAATATTCACCATCG   |
| <i>CmMYB#23</i> | Forward  | ATGGGGCCTAAACCAGAACCTG    |
|                 | Reversed | GTAGTGCGGTATCAGATGAGTC    |
| <i>CmMYB#24</i> | Forward  | CCAGAAGATGGTGACAGTAGCG    |
|                 | Reversed | CATCTCCATCTACTCGACAAG     |
| <i>CmMYB#25</i> | Forward  | GTGTCGCGAGATGTAGCGACAG    |
|                 | Reversed | CCTCTTCACCACAGGCACCACC    |
| <i>CmMYB#26</i> | Forward  | CGCTTCCTGGAGCGGAGTCGAG    |
|                 | Reversed | CCTCACTTCCATTCTAATCATC    |
| <i>CmMYB59</i>  | Forward  | ACTTAGTCTTACTCAAACATAAGTG |

|                 |          |                          |
|-----------------|----------|--------------------------|
|                 | Reversed | AATTTTGCCTTGTTCGGGATA    |
| <i>CmMYB#27</i> | Forward  | GAATGAGGATCCCTCGACCTTGG  |
|                 | Reversed | GAAGTAGATGATGCATATCGAG   |
| <i>CmMYB#28</i> | Forward  | CTCTTAGGCGACAATGATCCTCC  |
|                 | Reversed | TGTAGCACATTCATCCCATGTCG  |
| <i>CmMYB#29</i> | Forward  | GGAATAAGTATCTCCAATCACCG  |
|                 | Reversed | GTATCCACACCTTCATGATTCCC  |
| <i>CmMYB#30</i> | Forward  | CTCCTCTCGAACCCAATGGAGTC  |
|                 | Reversed | TTCTTACAACACACTTGCAAGCG  |
| <i>CmMYB#31</i> | Forward  | GCAAACCTTCTTCGGGGCATACTG |
|                 | Reversed | CTGCATGGACCATAAGTCTTCC   |
| <i>CmMYB#32</i> | Forward  | TCAGGGCAGAACAATCAAGTG    |
|                 | Reversed | ACTCATTATGTAGTAACTGCA    |
| <i>CmMYB#33</i> | Forward  | ACGATGGTGACAGTAGCGGCCG   |
|                 | Reversed | CTATCATCTCCATCTACTCGAC   |
| <i>CmMYB#34</i> | Forward  | GAGTCTAAAGGGCATGTGCAG    |
|                 | Reversed | GAAGTGGACACAGTCATACAG    |
| <i>CmMYB#35</i> | Forward  | CAGGAAGCCATGGAGGTGAGG    |
|                 | Reversed | GCAACACCTTTACGGCGCTCC    |
| <i>CmMYB#36</i> | Forward  | GCTGCTGAGGTACCTGGGGAG    |
|                 | Reversed | GTCCCACCCTCACCAGCATGG    |
| <i>CmMYB#37</i> | Forward  | CCAATAGTATGTGTTCAAAGG    |

|                 |          |                         |
|-----------------|----------|-------------------------|
|                 | Reversed | GCAGCCACATTTGTCCAGCGG   |
| <i>CmMYB#38</i> | Forward  | CGCCCTTGTTAACTAACGCCG   |
|                 | Reversed | CCTCCGTCCACGGCACCCCTC   |
| <i>CmMYB#39</i> | Forward  | GCGGATGTTGTTGTGTCTGCG   |
|                 | Reversed | CTCAGTCCATGGAACTCCTCG   |
| <i>CmMYB#40</i> | Forward  | TCGAACCAGGAAAATGGTCTG   |
|                 | Reversed | CTCCACTTCCGCTTCCACCTC   |
| <i>CmMYB#41</i> | Forward  | CTCGATGCTACGGGATATGCG   |
|                 | Reversed | CTCCAGTCTCCTTTCCCTACG   |
| <i>CmMYB#42</i> | Forward  | GCATGACACCACAAGAGGCGG   |
|                 | Reversed | GCGGTTCTCCCTTTGAGAGTC   |
| <i>CmMYB#43</i> | Forward  | GCGGCAGTTGCAGCTGCATAC   |
|                 | Reversed | CCACATCCACATCATTGCACC   |
| <i>CmMYB#44</i> | Forward  | CTCCGTGCTTATGTCCACCAG   |
|                 | Reversed | GTTCTTGTGGGGTTAAGGAGCC  |
| <i>CmMYB#45</i> | Forward  | GCATCGGTACAAGATTGGACC   |
|                 | Reversed | CATCTTCTCCA ACTCTGCATCG |
| <i>CmMYB#46</i> | Forward  | GAAGGGGAGAGCCTGTACCGC   |
|                 | Reversed | TTCGCTCTGATGCTTCCCGAC   |
| <i>CmMYB#47</i> | Forward  | CTGCTGACCATCTATCCTCTC   |
|                 | Reversed | CATGTTGTAGTACAATATCGG   |
| <i>CmMYB#48</i> | Forward  | TGGTGAGATCACCTTGTTGTG   |

|                 |          |                        |
|-----------------|----------|------------------------|
|                 | Reversed | CACACCTATTCAAGCCAGCAG  |
| <i>CmMYB#49</i> | Forward  | GAAGGGCATTACTCGATGGAC  |
|                 | Reversed | CTTGACTACCCATTGTCCATG  |
| <i>CmMYB#50</i> | Forward  | GCCTCATATCCCGGTCACGTC  |
|                 | Reversed | CATCATTCTCTGCTCCGTACG  |
| <i>CmMYB#51</i> | Forward  | GGTGCATGGAGTGAAGATGAAG |
|                 | Reversed | GCCACATCTAGCCAACCCAGC  |
| <i>CmMYB#52</i> | Forward  | AGACCAACTGGCTGACATGTC  |
|                 | Reversed | CACCAGAGGAAGGCTGCCCTC  |
| <i>CmMYB#53</i> | Forward  | CATTGCTTGGCTTAGAAGCGG  |
|                 | Reversed | CCTGACAGGCATGGACAGCAC  |
| <i>CmMYB#54</i> | Forward  | CTCGTTTACCTGGAAGAACCG  |
|                 | Reversed | ACATGTTGGAGTGAGACGAGC  |
| <i>CmMYB#55</i> | Forward  | TAGACTCTGAAGTCCATTCGG  |
|                 | Reversed | CATCTTCAGCAGAACACTTCC  |
| <i>CmMYB#56</i> | Forward  | CTTCGGTTAACCCCTAACAGC  |
|                 | Reversed | TCGGAGTATTAGCATCGCAGC  |
| <i>CmMYB#57</i> | Forward  | GTGCGAGTCCCAATAAGGGAG  |
|                 | Reversed | ACCAGCAACCTACCTACAGCC  |
| <i>CmMYB#58</i> | Forward  | ACGCAGACCGTAACAGAGATC  |
|                 | Reversed | CGGTTTGCTGACCCTCTGCAG  |
| <i>CmMYB#59</i> | Forward  | AAGGCGGATGGTCACAGGAGG  |

|                 |          |                        |
|-----------------|----------|------------------------|
|                 | Reversed | CAGCATTGTCCGTCCTGCCTG  |
| <i>CmMYB#60</i> | Forward  | GCCGGGAGAGGTGGCACAACC  |
|                 | Reversed | CTATCTCTGCCCATTTGTTGCC |
| <i>CmMYB#61</i> | Forward  | CCAGGGGAATTCTCTGAAGCTG |
|                 | Reversed | GGAGCTGACGACTGTGGGAGC  |
| <i>CmMYB#62</i> | Forward  | AGGTCGCGAGTAGGGTCACGG  |
|                 | Reversed | GCCCTCTATATCCCATTCTCC  |
| <i>CmMYB#63</i> | Forward  | TCTACCAAGTACATGTACTCC  |
|                 | Reversed | GTCCATCTCCCCCTCTTGAGC  |
| <i>CmMYB#64</i> | Forward  | CTGTATGTCAAGAGGCCAGTG  |
|                 | Reversed | CAGTGCTAGAAGGGTAAATAGG |
| <i>CmMYB#65</i> | Forward  | GTCACCACCTTGCAAAAGGGCC |
|                 | Reversed | CTAGGGGAATATCAAATACCCG |
| <i>CmMYB#66</i> | Forward  | AGCTCTCTCCTAGCTCACAC   |
|                 | Reversed | CATCCTTTCACAACATGGAGC  |
| <i>CmMYB#67</i> | Forward  | GGATGGTAGAACTCAGCTATG  |
|                 | Reversed | CTCTTGCGCAGACCACTGTCC  |
| <i>CmMYB#68</i> | Forward  | CTCCACGTCTCGATCTCTCAC  |
|                 | Reversed | CGGCTAAGAGAGTAACAAGGC  |
| <i>CmMYB#69</i> | Forward  | GATGAACGGGTACGAGACCGC  |
|                 | Reversed | GAGTCTCATGAAACGATGTGG  |
| <i>CmMYB#70</i> | Forward  | CTCCCAGATCCAACACCTCGC  |

|                 |          |                        |
|-----------------|----------|------------------------|
|                 | Reversed | CTCAGCTCATGCTATCCATGG  |
| <i>CmMYB#71</i> | Forward  | GCTTATGGGTCCAACCTTGAGC |
|                 | Reversed | ATGTCAAAGGGGCATTGGAC   |
| <i>CmMYB#72</i> | Forward  | TCGTGGGACGATTGTGCTACG  |
|                 | Reversed | TCTAGTGTGTCTAAGATGCTC  |
| <i>CmMYB#73</i> | Forward  | GAAAGGGGCTGTAGTCACCTG  |
|                 | Reversed | TGCACCACGCTTGAGATCAGG  |
| <i>CmMYB#74</i> | Forward  | TTCCACCTTAAGTCCCTATCC  |
|                 | Reversed | TCTAGCCAAGGCCCTCTACGC  |
| <i>CmMYB#75</i> | Forward  | GATGCACAAGTACCAGTCATG  |
|                 | Reversed | CCCGCTGCATCTTCTTATTCC  |
| <i>CmMYB#76</i> | Forward  | GATTACCCGTTTCATGCATTCC |
|                 | Reversed | AGTAACCGCCACCCGTCTACC  |
| <i>CmMYB#77</i> | Forward  | TGCTGTCAACTTATGAGGTTG  |
|                 | Reversed | GCCTAGCTGCAGGGTCTCACG  |
| <i>CmMYB#78</i> | Forward  | CACTTCTCTCCAACCTTGAGCC |
|                 | Reversed | TGCGCTCAGATGAATTAAGCC  |
| <i>CmMYB#79</i> | Forward  | GCTGCTCACTTGCCAAGGAGG  |
|                 | Reversed | GGTACCCAAGAGTTGGGTGCC  |
| <i>CmMYB#80</i> | Forward  | ATGGGGAGAAGAAGAACGGTG  |
|                 | Reversed | TTCAAACACATCTAGTCACTC  |
| <i>CmMYB#81</i> | Forward  | AGTTGCAGATTGAGATGGACG  |



|                 |          |                        |
|-----------------|----------|------------------------|
|                 | Reversed | CCATCTATTGCCAAGCTGAGC  |
| <i>CmMYB#82</i> | Forward  | AGATCTAGGCTTAGAAGCTCG  |
|                 | Reversed | GTGAATCTACTCTGTCCTCGC  |
| <i>CmMYB#83</i> | Forward  | GTGGCAACTGGATTGCTCTCC  |
|                 | Reversed | TGACTCTATCTTCATCATCAG  |
| <i>CmMYB#84</i> | Forward  | GGTCAAGCACTCTCTATTGGTG |
|                 | Reversed | GCAAGTTCACAACGAACCAACC |
| <i>CmMYB#85</i> | Forward  | GGAAGTACTATGAATGGTCCGG |
|                 | Reversed | CACTTGTTGGCCGTCTTCGATC |
| <i>CmCHS</i>    | Forward  | CAAGGAGGAGAAGATGAGAG   |
|                 | Reversed | CCGAACCCGAATAAAACAC    |
| <i>CmCHI</i>    | Forward  | GCAGGTGTGAGAGGTATG     |
|                 | Reversed | GCAACGGAATCGCTTTATC    |
| <i>CmF3H</i>    | Forward  | CACGGGTAATGTTAGGTAGG   |
|                 | Reversed | TGTAGGTCAAATCGGTCAAG   |
| <i>CmF3'H</i>   | Forward  | AGGCGGATTCATCGTTTC     |
|                 | Reversed | ACTCTTTGGGCTTATCAGG    |
| <i>CmDFR</i>    | Forward  | TAGTAACAAAGGCGGACAC    |
|                 | Reversed | GGATTATTCACCAAGTATGCTC |
| <i>CmANS</i>    | Forward  | GGGCTCCAACACTACTCTATG  |
|                 | Reversed | TCCTAACCTTCTCCTTATTCAC |
| <i>CmUFGT</i>   | Forward  | ATCACAGGGACTATCAACC    |

Reversed

TCCACCACCAGACAACTA

---

Supplementary Table S2 Primers used in cloning genes into SK, NLuc, CLuc and LUC vectors

| Genes            | Vectors | Primers  | Sequences (5'-3')                           |
|------------------|---------|----------|---------------------------------------------|
| <i>CmDFR</i>     | LUC     | Forward  | GGGGATCCGATGTGATTTTGGTGTT<br>GACTTG         |
|                  | LUC     | Reversed | TTCCATGGGTTGTTTAATCTTGTGG<br>TTTTG          |
| <i>CmUFGT</i>    | LUC     | Forward  | GGGGATCCATTAATATACTTAGGTT<br>AATTT          |
|                  | LUC     | Reversed | TTCCATGGTTGGCTGTATTTTAAGA<br>AAATG          |
| <i>CmMYB6</i>    | SK      | Forward  | TGGCGGCCGCATGGGGGAGTACAG<br>AAAAATGAGAC     |
|                  | SK      | Reversed | CCACTAGTGGATTGCAATATCATAG<br>TTGGTCCG       |
| <i>CmMYB#7</i>   | SK      | Forward  | AGAACTAGTGGATCCATGATGGATA<br>AACGTTCAAGGAAG |
|                  | SK      | Reversed | GGTATCGATAAGCTTTTAAGATTG<br>GTTCTTGTCTC     |
| <i>CmMYB#7-m</i> | SK      | Forward  | AGAACTAGTGGATCCATGATGGATA<br>AACGTTCAAGGAAG |
|                  | SK      | Reversed | GGTATCGATAAGCTTTTAAGATTG<br>GTTCTTGTCTC     |
| <i>CmMYB#15</i>  | SK      | Forward  | AGAACTAGTGGATCCATGGGAAGA<br>GCTCCTTGCTGTG   |

|                 |      |          |                                             |
|-----------------|------|----------|---------------------------------------------|
|                 | SK   | Reversed | GGTATCGATAAGCTTTCAA AATTCA<br>CCTTCAAACCCT  |
| <i>CmMYB#16</i> | SK   | Forward  | AGA ACTAGTGGATCCATGGGAAGA<br>ACACCGTGTTGTG  |
|                 | SK   | Reversed | GGTATCGATAAGCTTTTAATTCCATT<br>GCCAATGAAAC   |
| <i>CmMYB#17</i> | SK   | Forward  | AGA ACTAGTGGATCCATGAGAACT<br>ACCAGTAAGATGGC |
|                 | SK   | Reversed | GGTATCGATAAGCTTTTACTTCCTG<br>AATTGCCACAATTC |
| <i>CmMYB#85</i> | SK   | Forward  | AGA ACTAGTGGATCCATGGGAAGA<br>GCACCTTGTTGCTC |
|                 | SK   | Reversed | GGTATCGATAAGCTTTTACACTTGT<br>TGGCCGTCCTCG   |
| <i>CmbHLH2</i>  | SK   | Forward  | CCGTCGACATGGCTGCCAGCGGAC<br>CACCTCG         |
|                 | SK   | Reversed | CCGGGCCCTAAGGAGATATTATTT<br>GGTTGAT         |
| <i>CmMYB6</i>   | NLuc | Forward  | GCTCGGTACCATGGGGGAGTACAG<br>AAAAATGAGAC     |
|                 | NLuc | Reversed | TGGTCGACTAGTTGGTCCGAATTTA<br>AAAAGTC        |
| <i>CmbHLH2</i>  | CLuc | Forward  | GCGGTACCATGGCTGCCAGCGGAC<br>CACCTCG         |
|                 | CLuc | Reversed | AGGTCGACCTAAGGAGATATTATTT                   |

GGTTGAT

|                  |    |          |                                              |
|------------------|----|----------|----------------------------------------------|
| <i>CmMYB#7</i>   | AD | Forward  | GAGGCCAGTGAATTCATGATGGATA<br>AACGTTCAAGGA    |
|                  | AD | Reversed | GAGCTCGATGGATCCTTAAGATTTG<br>GTTCTTGTCCTCAAG |
| <i>CmMYB#7-m</i> | AD | Forward  | GAGGCCAGTGAATTCATGATGGATA<br>AACGTTCAAGGA    |
|                  | AD | Reversed | GAGCTCGATGGATCCTTAAGATTTG<br>GTTCTTGTCCTCAAG |
| <i>CmMYB#7</i>   | BD | Forward  | ATGGAGGCCGAATTCATGATGGATA<br>AACGTTCAAGGA    |
|                  | BD | Reversed | CAGGTCGACGGATCCTTAAGATTTG<br>GTTCTTGTCCTCAAG |
| <i>CmMYB#7-m</i> | BD | Forward  | ATGGAGGCCGAATTCATGATGGATA<br>AACGTTCAAGGA    |
|                  | BD | Reversed | CAGGTCGACGGATCCTTAAGATTTG<br>GTTCTTGTCCTCAAG |
| <i>CmbHLH2</i>   | AD | Forward  | GAGGCCAGTGAATTCATGGCTGCC<br>AGCGGACCACCTCG   |
|                  | AD | Reversed | GAGCTCGATGGATCCCTAAGGAGAT<br>ATTATTTGGTTGAT  |
| <i>CmbHLH2</i>   | BD | Forward  | ATGGAGGCCGAATTCATGGCTGCC<br>AGCGGACCACCTCG   |
|                  | BD | Reversed | CAGGTCGACGGATCCCTAAGGAGA<br>TATTATTTGGTTGAT  |

---

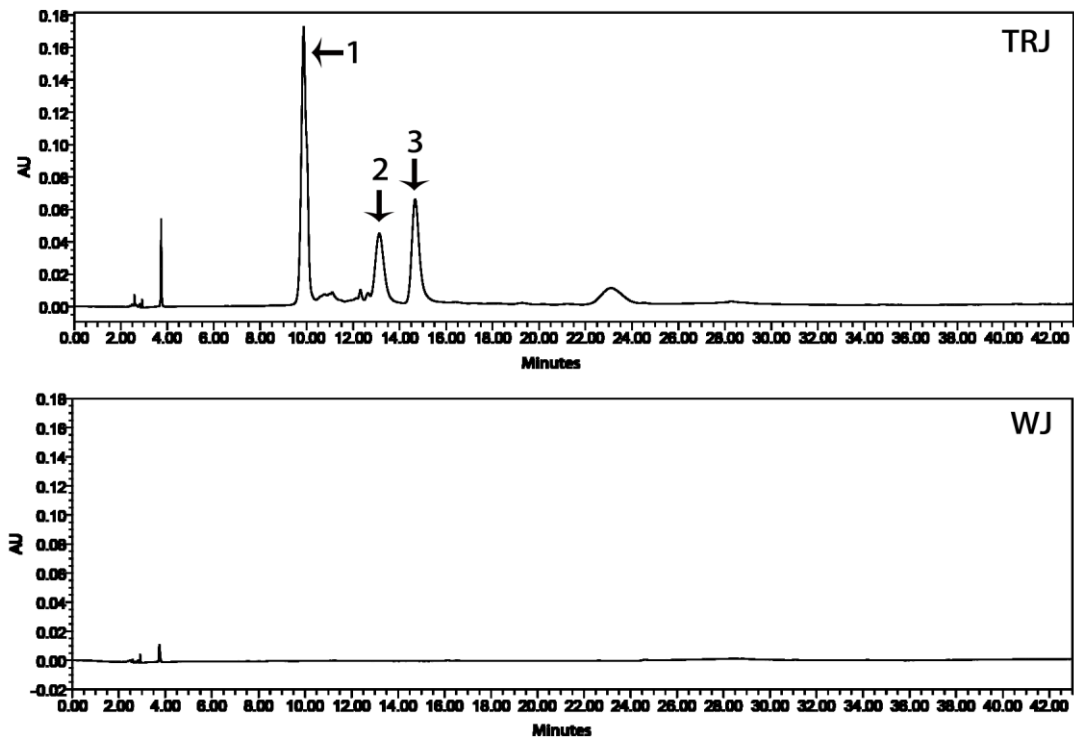

Fig. S1. HPLC analysis of extracts of 'Turning red Jimba' (TRJ) and white 'Jimba' (WJ) 'Jimba' petals. Y-axis indicates the absorbance at 530 nm. Three peaks were detected: cyanidin-3-glucoside (1), cyanidin-3-O-(6-O-acetyl- $\beta$ -D-glucoside) (2), cyanidin 3-O-(6''-O-succinyl- $\beta$ -glucopyranoside) (3).

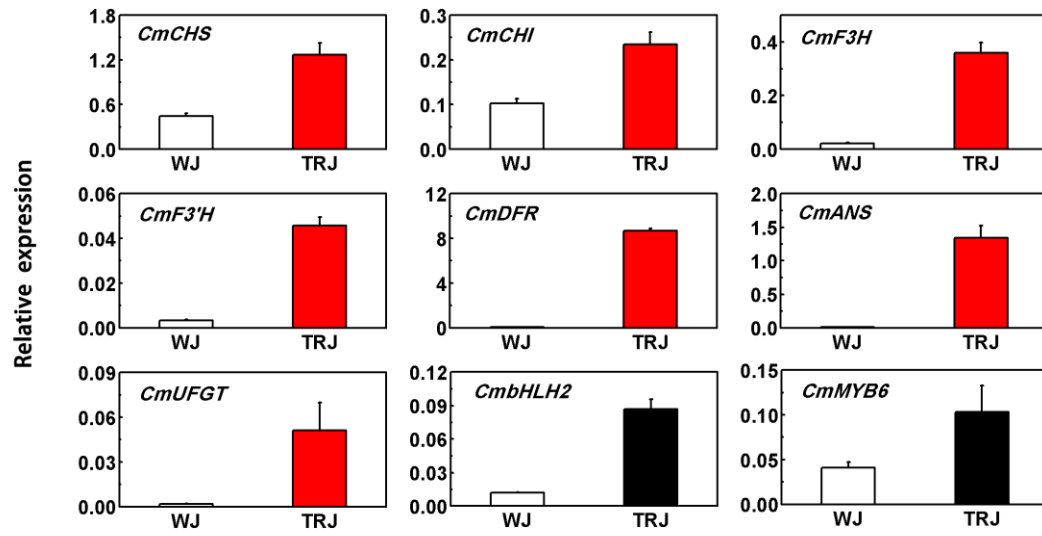

Fig. S2. The expression patterns of anthocyanin biosynthetic genes and two reported transcription factors were studied in white 'Jimba' (WJ) and 'Turning red Jimba' (TRJ). Error bars are the S.E. of three independent experiments.

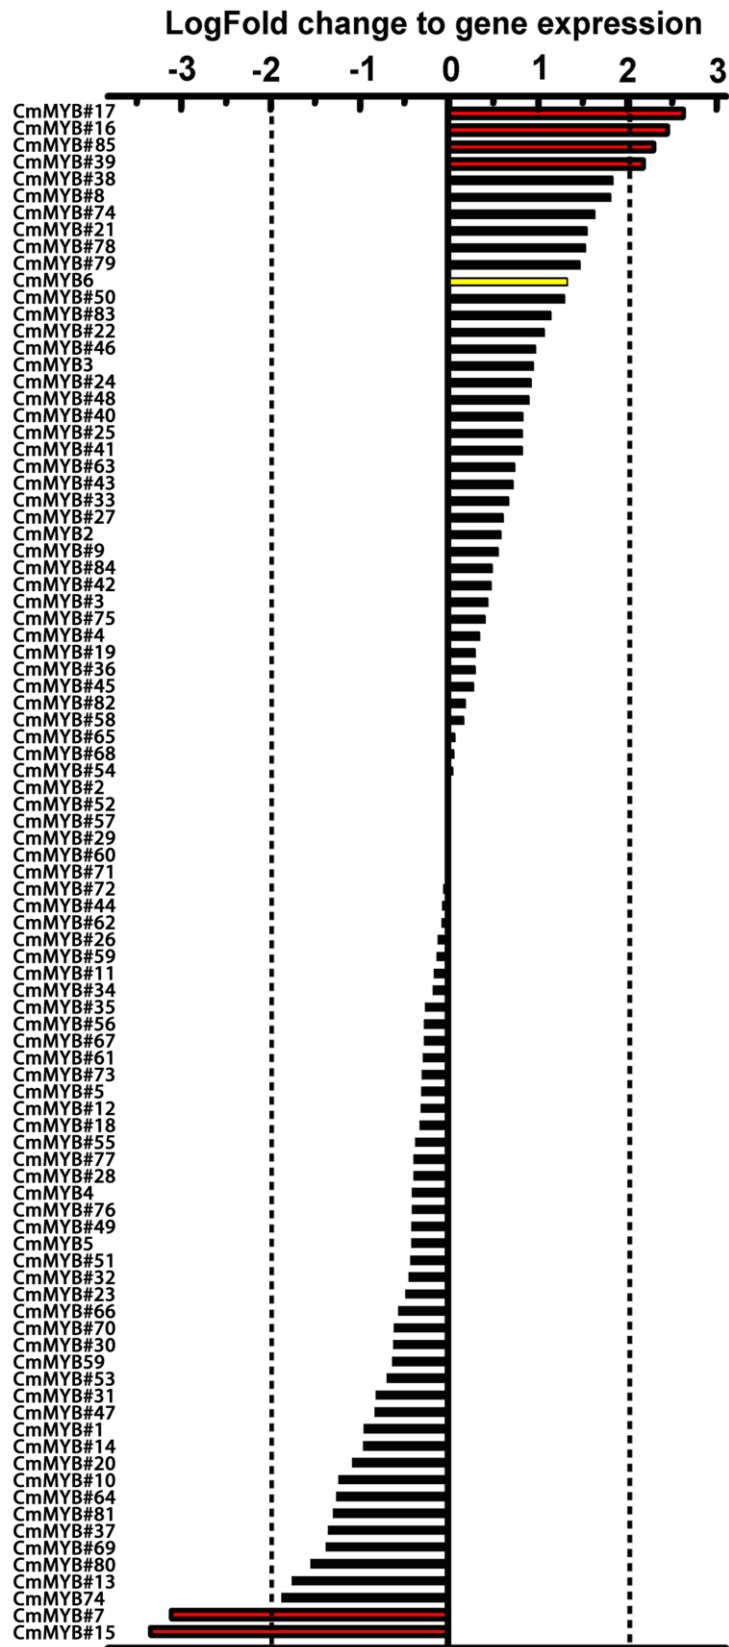

Fig. S3. Log Fold change expression of 91 MYBs in flower petals of white 'Jimba' (WJ) and 'Turning red Jimba' (TRJ). Log Fold changes above 2 were marked with red bars. The anthocyanin regulator *CmMYB6* was marked with yellow bar.



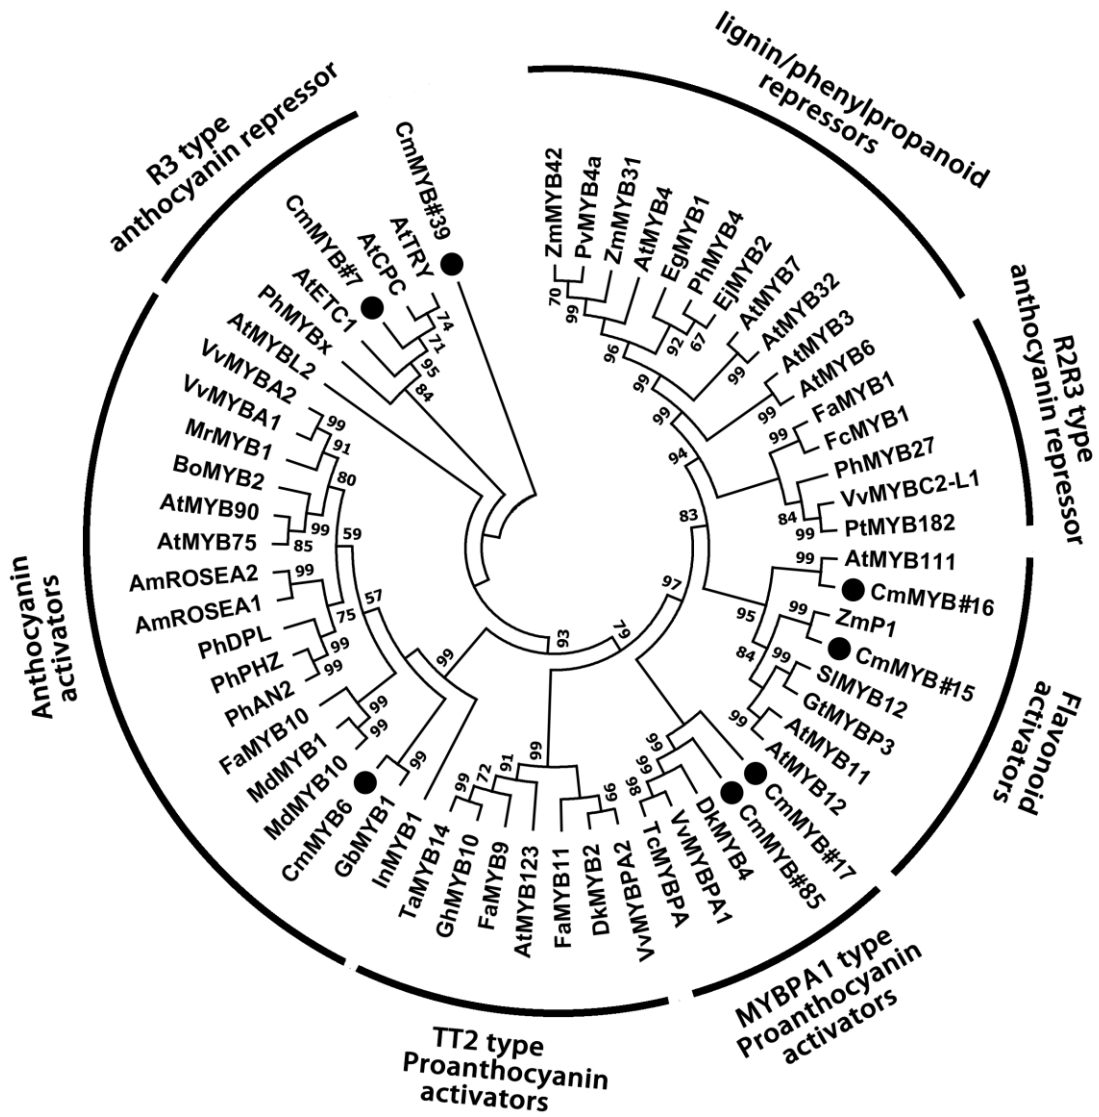

Fig. S4. Phylogenetic analysis of 7 CmMYBs and reported MYBs related to phenylpropanoid pathway in other plant species. Neighbor-joining Tree was constructed using MEGA7. MYBs from chrysanthemum were marked with black solid circle.

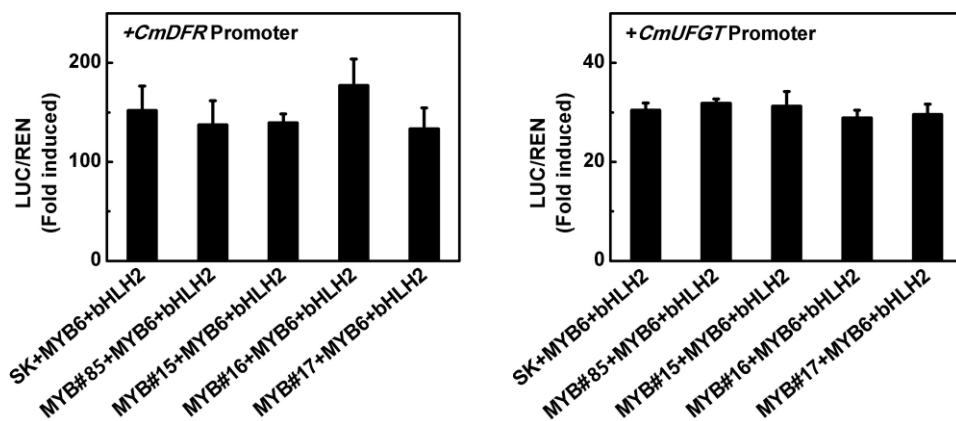

Fig. S5 Regulatory effects of transiently over expressing *CmMYB#85*, *CmMYB#15*, *CmMYB#16*, *CmMYB#17* with *CmMYB6* or *CmbHLH2* on transcription from *CmDFR* and *CmUFGT* promoters. SK refers to 'Empty vector'. Error bars are the S.E. of three independent experiments.

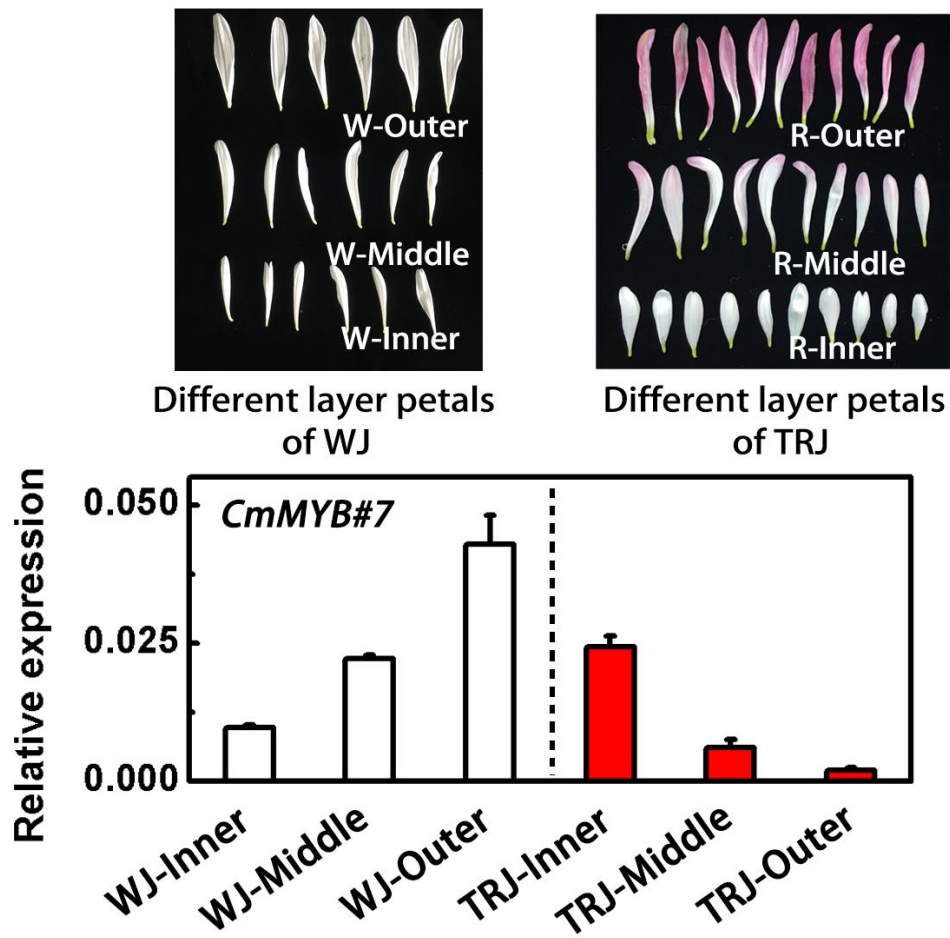

Fig. S6 The expression patterns of *CmMYB#7* in different type petals of white 'Jimba' and 'Turning red Jimba' were measured by real-time PCR. Error bars are the S.E. of three independent experiments.

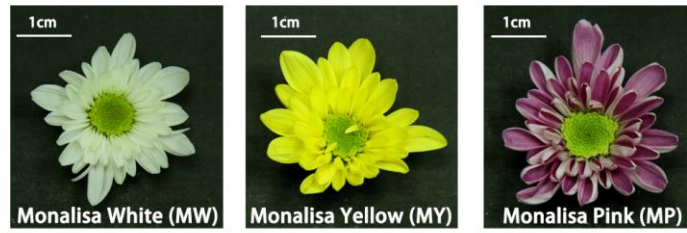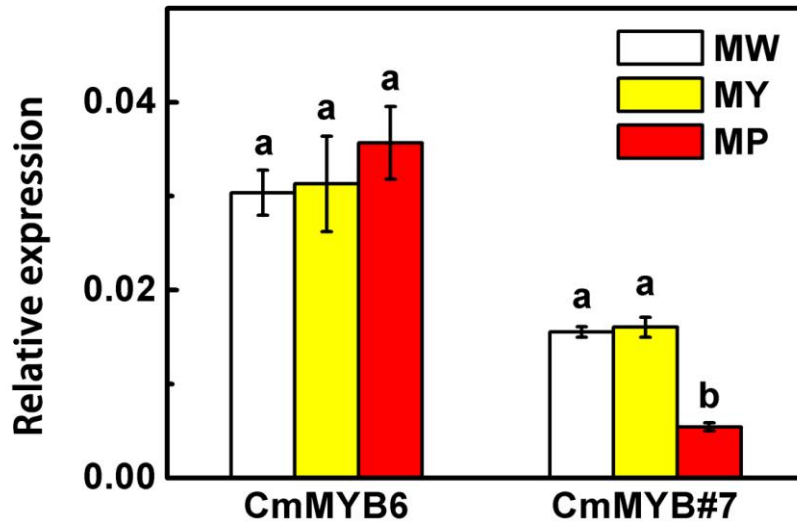

Fig. S7 The expression patterns of *CmMYB6* and *CmMYB#7* in three cultivars with different floral colors. Error bars are the S.E. of three independent experiments.
